# Supplementary material for: Efficient photocatalytic performance of hydrogen bonding between P25 and microcrystalline cellulose aerogel
Source: Royal Society of Chemistry journal article supplement (doi:10.1039/d4ra07087a), 2024-01-01

## Supporting Information

### Efficient photocatalytic performance of hydrogen bonding between P25 and microcrystalline cellulose aerogel

Junhao Zeng<sup>a</sup>, Di Zhang<sup>a</sup>, Guoliang Dou<sup>a</sup>, Qingming Zeng<sup>a\*</sup>, Jian Zhang<sup>a,b\*</sup>

<sup>a</sup> Shandong Engineering Research Center for High Performance Silicone Rubber, Weifang 261000, P. R. China

<sup>b</sup> Department of chemistry and chemical engineering, Jining University, Qufu 273100, P. R. China

Email: Qingming Zeng, 492656348@qq.com; Jian Zhang, sduchemzhang@163.com

**Figure S1.** XRD patterns of MCA, MCAP2, MCAP5, MCAP10, MCAP20 and P25.

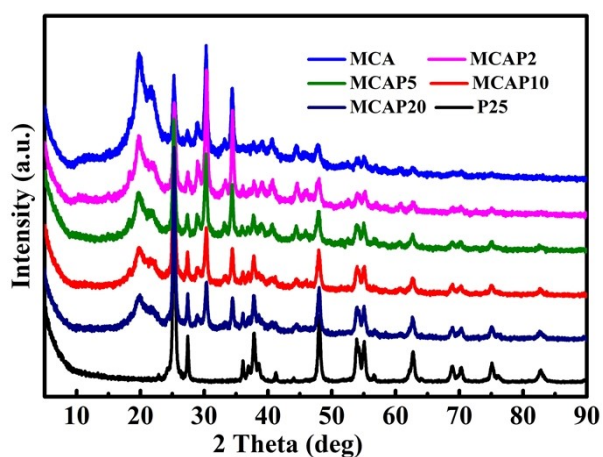

**Figure S2** Effect of contact time on AO7 adsorption.

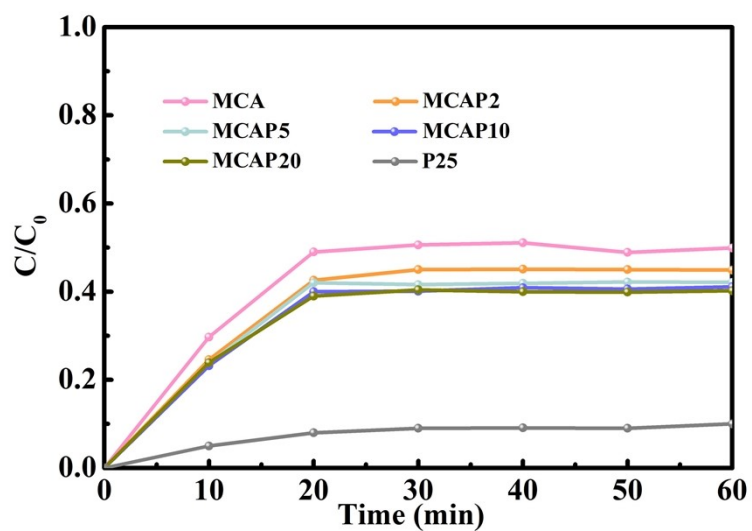

**Figure S3** Photocatalytic degradation curves of AO7 over MCAP20, P25,  $g\text{-C}_3\text{N}_4$ ,  $\text{Ag}_3\text{PO}_4/\text{POM}/\text{GO}$  and  $\text{AgSCN}/\text{AgCl}/\text{FeOCl}$ .

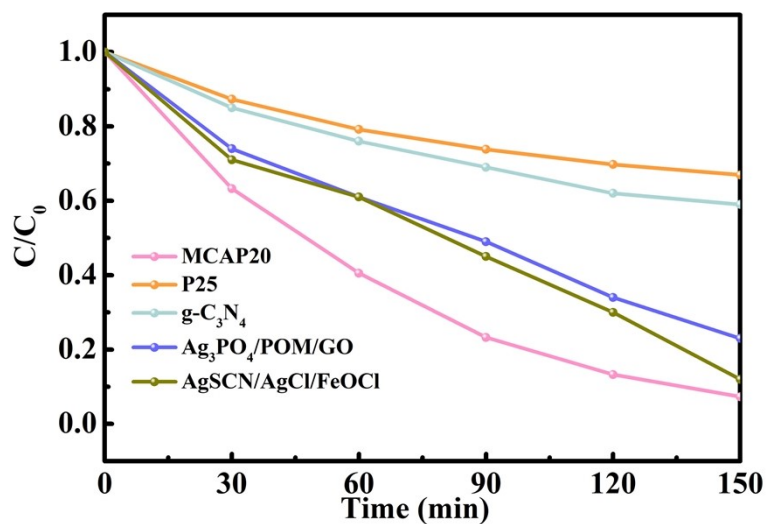

**Table S1.** Element contents of MCAP20 before and after the fifth cycling runs.

| Samples | C      | H     | O      | Ti    |
|---------|--------|-------|--------|-------|
| Before  | 37.568 | 5.219 | 46.774 | 5.250 |
| After   | 38.125 | 5.321 | 46.498 | 5.145 |

**Figure S4.** SEM image of MCAP20 after the cycling experiments.

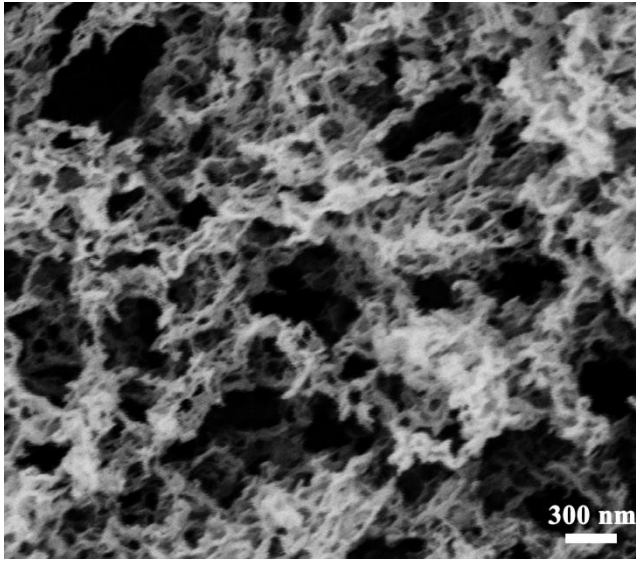

Supplement: d4ra07087a1.pdf [file d4ra07087a1.pdf]
